# Supplementary material for: Counterintuitive DNA Sequence Dependence in Supercoiling-Induced DNA Melting
Source: PubMed Central journal article supplement (PMC4625975; doi:10.1371/journal.pone.0141576), 2015-10-29
Supplement: pone.0141576.s006.pdf [file pone.0141576.s006.pdf]

GGCCGGCCAGCGCCTCCCGCAGCCCGTCCACCGCCGCCGAGGGCTCGCCGTCCACAGCCGGGCCCGCGAGCTGGGTACGCGCCACGCCTACCCGG  
TCCGTGCCCGTCCGCCGTACAGTCCAGAGCGGTGCGCAGCTCCGTCTCGGCCCTCCGGGACCGTGCATCCGAGATACACTGGCCGAGCTGGAAGT  
GCGTCCACGCCCTCGCCGTGACAGGACTCGCCCTCGCGGTGACGCTCCAGCGCGGTGCCAGCAGGGACCGGGCCCGGGCGAGATCGGCCTGGTCCCGGC  
GGACCGCCCGAGCGCGTGCAGCGACAGGCGCGGTCTCCCGCTGCCCGGCCGGTGCCTGGAGCGCAGCGCCTCGGTGAGCCTCGCCGCGCCTCCG  
TGAGATTGCCCTGGTGGTGCAGGGTATCCCGAGCGAGCAGCGCGAGCGCCGTCCCGCGTCTGTTGCTCGTCCGGTACGCGCCACGACGGACG  
ACAGCGTGGTCCGGCCCTGTCAGCTCGCCGAGTGCAGCGCCGCGATACCGTGCGCCACTGCACCGACCGCTCCAGCGGGCCCGAGTCCCGCCCGCC  
CTGGCCGACGCGCTGCGACAGCTCGCTGATCTCGCCGAGGCGGTAGAGTGCAGCGCGAGCAGACAGTATCGGGCAGCGCCAGCAGCCGAGCA  
CCGTGCGCTGCTCCAGCCCTCCCGTGGCGCAGCGCCGAGGTGATGAAGCTGGACTCCTCGTCCAGCCAGCGCAGCGCGGAGTCCAGGGACGGGAAG  
CCGTGCGCGTCAACCGCCCGCGCGGTGGACATCTGCGCTGACCATCCGGTCCAGCGCCCGCGGAGATCCGCGTAGTCTTGATCAGCCGCTCCT  
GTGCGCGGTCCGCTCGCGCGCTCCTCCTCGTCCGCGAGCCGGGCCCGCGGAAGCGCGGACGCGCTCGTGAGGCGGTAGCGCTGACCCGACC  
CGGTGATCAGCCCGCGTCCGCCAGCTCGGCCAGCAGCTTCCGCGCTCCTGCCGTCCGCGCAGCAGGGCCCGCGGCTGCGCGCGGAGGGAC  
GCCCCCCCCGAGGGCGAGCCGCCGAGCAGCCGGCGCGGTCTCCGACTGGTCCGGTAGCGGAGCCAGAGGGCGCGCTGACGCGGGTCCGAGCC  
CGGCTGGGCGCGAGTCCGTCCGCGAGTGTGGGGGTGCGGGTCCGCGGCGGGAGGTGGTCCGCGGGGGCGGGTGGTGTGCGGTGCTCGC  
GTGCTGGTGGCGCGGTGATCCAGTGCCTGGGTGTTCCGGGGCGTCCGGTCTCCGGGGTCCGGCGGGGCGGGTGGTGTGCGGTGCTCGC  
GGTACCGGGCGTGTGATGATCTGCCGACGGGACGCCCTCGGTACCGCGTACTCGCTGCCGGCGAGCCAGGGTCCGGGGTGTGCGG  
GGTGTGGTGTATCCCGCAGCCCGTGTGAGTCCCGCGTGGCGCGGTGGGCCGAACCGCGTCCCGTATCGCGCGCCCGGCCCGCTCGGGT  
GCTCGCGTACCGCCGTATCCGGTGTCCCGCCCGATGACGGTCCCGCGGTGCCGGTGTGCTCGGTGCTCCCGCTACGGCGCGCGCGGTTGT  
ATCGGTCCGCGCCCGCGTCCGCGGCTGTGCCGCGCAGGTGTGCCCGCCCGCGCCGGCTACTGGCGGCCCGCAGGAGGCCCGATCCGAG  
CGCCAGCGCAGTCCCGCCAGAGTTCGCGTACCCGGTCTCGCCCTGGCCGTGTCAGGGTCTGAGCGAGCCGTTCCGCGACGGAACGAGCAACTCC  
CCCGCTCCGGCGCGTCCAGCGCTCGACCGGGAGGTGGTGCACCCACCGCGGGTGGTCTCCGGCAGGTCCAGCGTCCGGCGCGGTGACCAGGACC  
AGGCTGTCCGAGCGTTCGGGATCAGGGTCCGACCTGCTCGGGTCCGCGCGTCTCGAGGACCAGGTACCCGAGCGCGGTAGATGCTGGT  
GTACACCTCGCCAGCGCCGTACCTGCTGTTCCGGCGAGGAACGTTCCGGAAGAGCAACTGGTCCCGGGCGCGCCGAGCCGGTGGAGGAGTGGGA  
GCAGGGCGTCCCGGTGGGGAGGGGACCGCCGCTGCGCGCAGATCGACAGGACCGCCCGGAAACAGGTCCTTGATGGTGGGAGCGCGC  
AGGGCAGTCCCGTGGCGCGGACCCCGCGCGTGCAGGACGACGAGTGGCGGGTCTCGTCCGCGCCCGCGCGTCCGACCCACTGGGC  
GATCTGCTCCACCGCTCCCTCGCGCCGTGAACGACCTTCCGGTCCGGAAGCTGGTGAAGGAGTCCGCGAGGGTGGAGCGCGCGCGGAGCG  
CGCCCGGTCCCGGCCGCAACGGCGCCCGCGGGTCCCGTCCGCGCGGGTGGCGGCCGTGAGCATCCGCTGCTGGTCCAGGAAGGGCCGGATG  
CCGCGCACCTCCAGCGCGTGGAGCCTGGAGCCGCAACTGCTCGGTCCCGCGGGTCCGCGAGCGTCCGGCCCTCGGTGGCGCGCGGGCCAGTGG  
GCGCGGTGCGCTTACGACGCGTGGTCCGGCTCCGGCCCGCAGCAGTCCCGCGCGCCAGCGCGGTCCGGTCCGCGTCCGAGCGCGACATCG  
GCGCGACGGCGGAGCCCGCGACCGCGTACCAGCGCGGAGTCTATCTCCCGGGTGAAGTCCGCGGACAGCGGTGCTGGCGGCTTCTG  
CCGCGTCCAGCGCTCCTGATCGCGCTGATTCGTCGCGCGCGCCCGCGCATGCTGTCGAGCGCCCGCGCGCGGCGGAGCAGCGTGTGCGGTC  
CGTCCGGTGTCCGGCGCGGGTCTCCTCCTCACGCGCGTGCAGAGCCTTCCGCTCCGGCCCGTACTGTCCCGCATCGGGGTCCCGCTCCCTC  
GTGCGGTTCCGTTACGTTGTCAGTGTCTGGTGGCGCCCGGAAGCGAGGGAAGATCGTGTGGCGTTCATGTCATACCGTCCGGGACGTCCTCG  
GCTACCCCTCGGGGGGAAGGATCAGCGCGGCCCGCAGCGGGAGCAGTCCGGGGCCAGCGCGGTGCGTTCGAGGTGACGCCGGGGCGCGCG  
CGTCTCGCGACGTTCCGTGGCGTCCGATCCAGACGAAGTCCAGAGCGCGAGCCCGGTGAGCACCGCCAGGAAGAACCGCGCGGCACGACCGCC  
CGCACCCACCGCGCGCCCGCGCAGCGCCACCGCGAGCGCCACGAGAGCAGCCCGCGGTGGCCCCGGCGATACCGCCAGCGCGGTCTGCCAG  
AACCACAGTGAACAGGCTGATGAATCGCGACACGAGCAGCAGTCCCGCGCGCGCCAGCAGATCCGGTCCGTTCCGTAACCGCGAGTCCGC  
CGAGCAGGAGCGTGGACAGCGGGGAGCCAGGGTGGCCGTCAGGGATTCCATGGGGGAAGAGACACCCCGTACCGCGTTCGGTTCCGGGCC  
GCCCGGTCCCTCAGTCTCCCTGATGATGACGCGCGCCCGCAGCAGTCTGACCAATCTCGCGTCCGAGGTGAGGAGTCCGAGCAGCGCGCGCGG  
GCGGAGTGCAGTCCCGCGCAGCAGGCGTCAATGGCGTACTTGTGTCCTGACGCCACCGCGCTCCCGGAGCAGACCGCGGTGAGGGAGTCCCT  
CTGGTACCGGTTCCACTCGCAGCCGGGAGAGAACCAGTTCAGCGTGAATTCTGGCCTTGTGGTCCCC

**Construct 2, 58% GC content (excluding handles):**

GGCCGCACAGTAATTACGGTGTGCGCTGGAGAAACAGGGTGTGGAAATCACGCTGATTTACAGCGGCAGCCATAAGGTGGATGGCAACCCCTACAGCC  
ATCTTCCGATGACGTCGGGAGACTGCAGTCCCGGATGGACGCAACCCGCCAGATGTTTGCAGAGAGGTGTCGGCATATACCGGCTGTCCGTGCA  
GGTTGTGCTGGATACCGAGGTCAGTGTACAGCGGTGAGGAGCCATTGATGCCGACTGGTGTGAACTTTGTAACAGCACCAGTGCATACCGTGC  
ATGCGTGTGACTGGATGCAGTAAATCCGCTCTCAGGAGGGCGAATGACCAAAGAGACTCAATCAACAAGTTCAGCCACTGCTTCGAGGCTGA  
CGTTACTGACGTGGTGCAGCGACGGAGGGGAGAACGCCAGCGCGCGCAGCCGAGCTGAACGCGCAGATACCGCAGCGGTTCCGGCAGAAAACA  
GCCGATTATGGGGATCCTCAACTGTGAGGAGGCTCACGAGCGAAGAACAGGCACGCGTGTGGCAGAAACCCCGGTATGACCGTGAACACGGCCC  
GCCGATTCTGGCCGACACACAGAGTGCAGAGCGCGCAGTGCAGTGCCTGGATCTGATGACGGGGCAGCCGCGACCGCTGGTGCAGGTA  
ACCCGGCATCTGATGCCGTTAACGATTTGCTGAACACACAGTGTAAAGGATGTTTATGACGAGCAAAGAAACCTTTACCCATTACCGCCGAGGGCAAC  
AGTGACCCGGCTATACCGCAACCGCGCCCGGGGATTGAGTGCAGAAAGCGCTGCAATGACCCCGCTGATGCTGGACACCTCCAGCGTAAGCTGGTTG  
CGTGGGATGGCACCACCGAGGTCGCGCTGGCATTCTGCGGTTGCTGCTGACAGACAGCACCACGCTGACGTTTACAAGTCCGGCAGTTCCTG  
TATGAGGATGTGCTGCGCGGAGGCTGCCAGCGAGAGCAAAAAACGGACCGGTTTCCGGAAACGGCAATCAGATCGTTTAACTTACCTTCAT  
CACTAAAGCCCGCTGTGCGGCTTTTTTACGGGATTTTTTATGTCGATGTACAAACCCCAACTGCTGGCGGCAAAAGAGCAGAAATTAAGTTTATG  
CCGCTGTTTCCGCTCTTTTTCCGTGAGAGCTATCCCTCACCACGGAGAAAGTCTACTCTCAAAATCCGGGACTGTTAAACATGGCGCTGTACGTTT  
CCCGATTGTTTCCGGTGGGTTATCCGTTCCCGTGGCGGCTCCACTCTGAATTTACGCCGGGATATGTCAGCCGAGCATGAAGTGAATCCGAGATG  
ACCCTGCGTCCGCTGCCGATGAAGATCCGAGAATCTGGCGACCCGGCTTACCGCCCGCTCGCATCATCATGCAAAACATGCGTACGAGAGGCTGG  
CCATTGCTCAGGTGAAGAGATGACAGGAGTTCGCGTGTAAAGGGCAAAATACCCATGACCGGTGAAGCCTTCGATCCGGTTGAGGTGGATATGGG  
CCGAGTGGAGAGAATAACATCACGAGTCCGGCGGACGGAGTGGAGCAAGCGTGAAGTCCAGTATGACCCGACCGACGATATGAGCCTACGC  
GCTGAACGCCAGCGGTGGTGAATATCATGTTGATCCGAAAGGCTGGCGCTGTTCCGTTCTTCAAAGCCGTAAGGAGAAGCTGGATACCCGT  
CGTGGCTTAATCCGAGCTGGAGACAGCGGTGAAAGACCTGGGCAAAGCGGTGCTATAAGGGGATGTATGGCGATGTGCCATGCTGTATTCCG  
GACAGTACGTGAAAAACGGCGTCAAAAAGAACTTCTGCCGACAAACAGATGGTGTGGGAAACTCAGGCACGCGGTCTCGCACCTATGGTGCAC



TTTGGTGATGGCTATTCTCAGCGAGCGCCTGCCGGGCTGAATGCCAACCTGAAAACGTACAGCGTGACGCTTTCTGTCCCCCGTGAGGAGGCCACGGTACT  
GGAGTCGTTTTCTGGAAGAGCACGGGGGCTGGAATCCTTTCTGTGGACGCCGCTTATGAGTGGCGGCAGATAAAGGTGACCTGCGCAAATGGTCGTC  
GCGGGTCAGTATGCTGCGTGTGAGTTTCAGCGCAGAGTTTGAACAGGTGGTGAACCTGATGCAGGATATCCGGCAGGAAACACTGAATGAATGCACCCGT  
GCGGAGCAGTCGGCCAGCGTGGTCTCTGGGAAATCGACCTGACAGAGGTGCGTGGGAAACGTTATTTTTCTGTAATGAGCAGAACGAAAAAGGTGAG  
CCGGTCACCTGGCAGGGGGCAGATATCAGCCGATCCCATTCAGGGGAGCGGTTTTGAACTGAATGGCAAAGGCACCACTGACGCGCCACGCTGACG  
GTTTCTAACCTGTACGGTATGGTCAACGGGATGGCGGAAGATATGCAGAGTCTGGTGGCGGAACGGTGGTCCGGCGTAAGGTTTACGCCGTTTTCTGG  
ATGCGGTGAACTTCGTCAACGGAAACAGTTACGCCGATCCGGAGCAGGAGGTGATCAGCCGCTGGCGCATTGAGCAGTGCAGCGAAGTGGCGGGTGA  
GTGCTCCTTTGTAAGTCCAGCGACGGAACGGATGGCGCTGTTTTCCGGGACGTATCATGCTGGCCAAACCTGCACCTGGACCTATCGCGGTGAC  
GAGTGGCGTTATAGCGTCCGGCTGTCGCGGATGAATATGACCAGCCAACGTCGATATACGAAGGATAAATGCAGCAAATGCCTGAGCGGTTGTAAGT  
TCCGCAATAACGTCGCAACTTTGGCGGCTCCTTTCCATTAAACAACTTTCGACGTAATCCCATGACACAGACAGAATCAGCGATTCTGGCGCAGCCCG  
GCGATGTGCGCCAGCGGAGTCTGCGGCTTCTGGTAAGCACGCCGAGGGGAAAGATAATTTCCCTGCGTGAATATCTCCGGTGGAGCGGAGGCTAT  
TTCCGATGTGCGCGAAGACTGGCTGACGAGCAGAAATGCAGGGTGGATTGTGGCGTGGTCCACAGCCACCCCGGTGGTCTGCCCTGGCTGAGTGAG  
GCCGACCGGGCTGCAGGTGCAGAGTATTTGCCGTGGTGGTCTGCCGGGGACGATTATAAGTCCGCTGTGCGCCATCTCACCGGGGCG  
CGCTTTGAGCAGGTGTGACGGACTGTACACTGTTCCGGGATGCTTATCATCTGGCGGGATTGAGATGCCGACTTTCATCGTGGAGTACTGGT  
GGCGTAACGGCCAGAATCTCTATCTGATAATCTGGAGGCGACGGGGCTGTATCAGGTGCCGTTGTCAGCGGCACAGCCGGCGATGTGCTGCTGTGCTG  
TTTTGGTTCATCAGTCCGAATCAGCCGCAATTTACTGCGGCGACGGGAGCTGCTGCACCATATCTGAACAACCTGAGCAAACGAGAGAGGTACACCG  
ACAAATGGCAGCGACACACTCCCTCTGCGCTCACCGGGATGGCGCGCATCTGCCTTTACGGGGATTACAAACGATTTGGTCCCGCATGCACCTTC  
GTGTGAAAACGGGGGCTGAAGCCATCCGGGCACTGGCCACACAGTCCCGGCGTTTCGTCAGAACTGAGCGACGGCTGGTATCAGGTACGGATTGCCG  
GGCGGGACGTCAGCACGTCGGGTTAACGGCGC

**Construct 3, 42% asymmetric spread of GC content (excluding handles):**

GGCCGCTCCGTGGTGGCACAGAGTACGGCAGACGCGAAGAAATCAGCCGGCGATGCCAGTGCATCAGCTGCTCAGGTGCGGGCCCTGTGACTGATGCA  
ACTGACTCAGCAGCGCCGCCAGCAGTCCGCCGACAGGCTGCATCGTACGTCAGGAAGCGTCTCCGGCGCAGAAGCGGCATCAGCAAAGGCCACT  
GAAGCGGAAAAAGTCCCGCAGCCGACAGTCTCAAAAAACGCGGCCACCACTGCGCGTGGCGGAAACGTCAGAAACGAATGCTGCAGCGTC  
ACAACAATCAGCGCCACGCTGCTCCCTCACCGCGGCCACGAAAGCTCAGAGGCGCCACTTCAGCACAGAGATGCGGTGCCCTCAAAAGAGCAGCAAAA  
ATCATCAGAAACGAACGCATCATCAAGTGCCTGCTGCACTTCTCCGCAACGGCGGCAAAAATTTGCGCAGGCGGCAAAAACGTCGAGACGAAT  
GCCAGGTCTGAAACAGCAGCGGAACGGAGCGCTCTGCCGGCAGACGCAAAAACGCGCGCGGGGAGTGCCTAACGGCATCCACGAAGGC  
GACAGAGGCTGCGGGAAGTCCGATCAGCATCGCAGAGCAAAAGTCCGGCAGAAAGCGCGCAATACGTGCAAAAAATTCGCAAAAACGTCAGAAAG  
ATATAGCTCAGCTGTCGCGCTTGGAGTGCAGACACAACGAGAAAGGGGATAGTGCAGCTCAGCAGTGCACCAACAGCAGTCTGAAACGCTTGTGTC  
AACGCCAAAGCGGTTAAGTGGTAAATGGATGAAACGAACAGAAAAGCCACTGGACAGTCCGGCACTGACCGGAACGCCAACAGCACACCGCGCTC  
AGGGGAACAAACAATACCCAGATTGCGAACACCGCTTTGTACTGGCCGCGATTGCAGATGTTATCGACGCTCACCTGACGCACTGAATACGCTGAATGA  
ACTGGCCGACGCGCTCGGGAATGATCCAGATTTTGTACCACCATGACTAACCGCTTCCGGGTAACAACCGAAGAATGCGACACTGACGGCGCTGGCA  
GGGCTTTCCACGGGCAAAAATAAATACCGTATTTTGCAGAAAATGATGCCGCCAGCCTGACTGAACTGACTCAGGTTGGCAGGGATATTCTGGCAAAA  
ATTCGTTGAGATGTTCTTGAATACCTTGGGCGCGTGAGAAATCGGCCCTTCCGGCAGGTGCGCGGATCCCGTGGCCATCAGATATCGTCCGCTGGCT  
ACGTCCTGATGCAGGGGACGGCGTTTGACAAATCAGCCTACCCAAAATCTGCTGTCGCGTATCCATCGGGTGTGCTTCTGATATGCGAGGCTGGACAATC  
AAGGGGAAACCCGCCAGCGTCTGCTGATTGTCTCAGGAACAGGATGGAATTAAGTCCGACACCCACAGTCCAGTGCATCCGGTACGGATTTGGGG  
ACGAAAACCATCGTCTGTTGATTACGGGACGAAACACAGGCAGTTTCGATTACGGCACCAAATCGACGAATAACACGGGGGCTCATGCTCACAGTC  
TGAGCGGTTAACAGGGGCGCGGGTGTCTATGCCACACAAGTGGTTAAGGATGAACAGTCTGGCTGGAGTCAGATGGAACAGCAACCATTACAG  
GAAGTTATCCACAGTTAAAGGAACAGCACACAGGGTATTGCTTATTTATCGAAAACGGCAGCAGTACGGGACGCCACAGTCACTATTGTCGGTACAGCC  
GTGAGTGCCGCTGCACATCGCATACAGTGGTATTGGTGCAGCACCAGCAGTCCGGTGTATCGGTGCTCATGCCATTCTTTCAGTATTGGTTCACACGGA  
CACACCATACCGTTAACGCTGCGGGTAACGCGGAAACACCGTCAAAAACATTGCATTTAACTATAATTGAGGCTTGCATAAATGGCATTGCAATGAGT  
GAACAACACGGACCAATAAAAATTTATAATCTGCTGGCGGAACTAATGAATTTATTGGTGAAGGTGACGCATATATTCCGCTCATAACGGCTGCGCTGCA  
AACAGTACCGATATTGCACCGCAGATATTCCGGCTGGCTTTGGGCTGTTTTCAACAGTGCATGAGGCATCGTGGCATCTCGTTGAAGACCATCGGGGTAA  
AACCCTATGACGTGGCTCCGGCGACGCGTTATTTATTTCTGAACTCGTCCGTTACCGGAAAAATTTACCTGGTTATCGCCGGGAGGGGAATATCAGA  
AGTGAACGGCACAGCCTGGTGAAGGATACGGAAGCAGAAAACGTTCCGGATCCGGGAGGCGGAAGAAACAAAAAAGCCTGATGCAGGTAGCC  
AGTGCAGATATGCGCCGCTCAGGATGCTGCAGATCTGGAATGCAACGAAGGAAGAAACCTCGTGTGGAAGCCTGGAAGAAGTATCGGGTGTGTC  
TGAACCGTGTGATACATCAACTGCACCTGATATTGAGTGGCTGCTGCTCCTGTTATGGAGTAACTGTTTGTGATATGCCGAGAAACGTTGATGAAAT  
AACGTTCTGCGGTTAGTTAGTATATTGTAAGCTGAGTATTGGTATTATTGGCGATTATTATCTCAGGAGAATAATGGAAGTCTATGACTCAATTGTTCA  
AGTGTATTACATACCCGAATGCTTTTAAAGACTGAACGCATGAAATATGTTTTTCTCATGTTTTGAGTCTGCTGTTGATATTTCTAAAGTCCGTTTTTTTT  
CTTCGTTTTCTCAACTATTTTCCATGAAATACATTTTTGATTATTATTGAATCAATTTCAATTTACCTGAAAGTCTTTCATCTATAATTGGCATTGTATGATTG  
GTTTATTGGAGTAGATGCTTCTTTCTGAGCCATAGCTCTGATATCCAAATGAAGCCATAGGCATTTGTTATTTGGCTCTGCAGCTGCATAACGCCAAAA  
AATATATTTATCTGCTTCTCAATGTTGATTGATTAATCAATTTGGATGGAATTTTATCATAAAAAATTAATGTTTGAATGTGATAACCGTCCCTTA  
AAAAAGTGGTTCTGCAAGCTTGGCTGTATAGTCAACTAATCTTCTGTCGAAGTGCATTTTTAGGCTTATCTACCAGTTTTAGACGCTCTTTAATATCTCA  
GGAATTTTTATTGTCATATTGATCATCTAAATGACAATTTGCTTATGGAGTAACTTTTAAATTTAAATAAGTTATTCTCCTGGCTTCAATAAATAAGA  
GTGCAATGATTTGGCGAAATCAGCTCACCATTGGATTGTTTATTGATGCAAGAGAGTTACAGCAGTTATACATTCTGCATAGATTATAGCTAA  
GGCATGTAATAATTCGTAATCTTTTAGCGTATTAGCGACCCATCGTCTTCTGATTTAATAATAGATGATTCAGTTAAATATGAAGGTAATTTCTTTGTGCA  
AGTCTGACTAACTTTTTATAACAAATGTTTAACTACTTTTCAATTTGTAATAAACTCAATGTCATTTTCTCAATGTAAGATGAAATAAGAGTAGCCTTTGCCTC  
GCTATACATTTCTAAATCGCCTGTTTTCTATCGTATTGCGAGAATTTTTAGCCAAAGCCATTAATGGATCATTTTTCCATTTTTCAATAACATTATTGTTATA  
CCAAATGTCATATCTATAACTGTTTTGTTTTTGAATAATAAATGTTACTGTTCTGCGGTTGGAGGAATTGATTCAAAATCAAGCGAAATAATTCAG  
GGTCAAAATATGATCAATGCAGCATTGGAGCAAGTGCATAAATCTTAAAGTCTTCTTCCATGGTTTTTATGTCATAAACTCTCCATTTTGTAGAGTTG  
CATGCTAGATGCTGATATTTTTAGAGGTGATAAAATTAAGTCTTAACTGCAATGTAATAACAAGTTGTTGATCTTGAATGATTCTTATCAGAAACCAT  
ATAGTAAATGATTACACAGGAAATTTTAAATATTATTATCATTATTATGATTAATAAATAGAGTTGGCTTGGCTGCTAACACGTTGCTCATAGG

AGATATGGTAGAGCCGACACACGTCGTATGCAGGAACGTGCTGCGGCTGGCTGGTGAACCTCCGATAGTGCGGGTGTTGAATGATTTCCAGTTGCTACC  
GATTTTACATATTTTTGTCATGAGAGAAATTTGTACCACCTCCACCAGCCATCTAGACTGTACGCCACTGTCCCTAGGACTGCTATGTGCCGGAGCGGCAT  
TACAAACGTCCTTCTCGGTGCATGCCACTGTTGCCAATGACCTGCCTAGGAATTGGTTAGCAAGTTACTACCGGATTTTGTAAAAACAGCCCTCCTCATATA  
AAAAGTATTCGTTCACTTCCGATAAGCGTCGTAATTTTCTATCTTTCATCATATTTAGATCCCTCTGAAAAATCTTCCGAGTTTGTAGGCACTGATACATA  
ACTTTTTCAATAATTGGGGAAGTCATTCAAATCTATAATAGGTTTCAGATTTGCTTCAATAAATCTGACTGTAGCTGCTGAAACGTTGCGGTTGAACTAT  
ATTTCTTATAACTTTACGAAAGAGTTCTTTGAGTAATCACTTCACTCAAGTGTCCCTGCCTCCAAACGATACCTGTTAGCAATATTTAATAGCTTGAAA  
TGATGAAGAGCTGTGTGTTCTTCTGCTCCAGTTCCGCGGGCATTCAACATAAAAACTGATAGCACCCGGAGTTCCGGAACGAAAATTTGCATATACC  
CATTGCTCAGGAAAAAATGTCCTTGTGATATAGGGATGAATCGTGTGGTGTACCTCATCTACTGCGAAAACTTGACCTTTCTCCCATATTGCAAGTCGC  
GGCAGATGGAATAAATAGGCATCACGAAAAATTCAGGATAATGTGCAATAGGAAGAAAAATGATCTATATTTTTGTCTGTCTATATCACACAAA  
ATGGACATTTTTCACCTGATGAAACAAGCATGTCATCGTAATATGTTCTAGCGGTTTGTTTTATCTCGGAGATTATTTTCATAAAGCTTTTCTAATTTAAC  
TTTGTGAGTTTACCACTAAGGTTGTAGGCTCAAGAGGGTGTCTCTGCTGTAGGTAATAAAGTACCTGTCGAGCTTAATATTCTATATTGTTGTTCTT  
TCTGCAAAAAAGTGGGGAAGTGAGTAATGAAATTTTCTAACATTTATCTGCATCATACCTCCGAGCATTATTAAGCATTTCGCTATAAGTTCTCGCTGG  
AAGAGGTAGTTTTTTCATTGACTTTACCTTCATCTGTTTATTATCATCGTTTTAAACGGTTCGACCTTCTAATCTATCTGACCATTATAATTTTTAGA  
ATGTTTTCATAAAGAGCTCTGAATCAACGGACTGCGATAAATAGTGGTGTATCCAGAATTTGCACTTCAAGTAAAAACACCTCAGAGTAAAAACCC  
TAAGTTCTCACGAATGTCATATCCGGACGGATAATATTTATTGCTTCTTGTACCGTAGGACTTTCCACATGCAGGATTTTGAACCTCTTGCAGTACT  
ACTGGGGAATGAGTTGCAATTTGCTACACCATTGCGTGCATCGAGTAAGTCGCTTAAATGTTCTGTAATAAAGCAAGGAGCAAAAGGTGGATGCAGATGAA  
CCTCTGTTTCATGAAATAAATAAATGACTTTTCGCAACGACATCTACTAATCTGTGATAGTAATAAACAATGATGTCAGAGCTCATTGCAAGCA  
GATATTTCTGGATATTGTCATAAACAATTTAGTGAATTTATCATCGTCCACTGAACTGTGTTTCTTACGTTCTAATCTTCTATTTAGAAATGAGGCTG  
ATGAGTTCCATATTTGAAAAGTTTTCATCACTACTAGTTTTTGTAGCTTCAAGCCAGAGTTGCTTTTTTCTATCTACTCTCATACCAACAAATGCTGA  
AATGAATCTAAGCGGAGATCGCTAGTGATTTTAACTATTGCTGGCAGCATTCTTGTAGTCCAAATAAAAAGTATTGTGTACCTTTGCTGGTCAGGTTG  
TTCTTTAGGAGGAGTAAAAGGATCAATGCCTAAACGAACTGAAACAAGCGATCGAAAAATCCCTTTGGGATTCTTACTCGATAAGTCTATTTTTC  
AGAGAAAAATTCATTGTTTTCTGGTGGTGTGATGACCAATCATCCATTCAAATTTGTTTTACCACACCCATTCCGCCGATAAAGCATGAAT  
TTCGTGCTGGGCATAGAATTAACCGTCACCTCAAAGGTATAGTTAACTCACTGAATCCGGAGCAGCTTTTTCTATTAATGAAAAGTGGAAATCTGACAA  
TCTGGCAAACCTTTAACACACGTCGCAACTGTCATGAATTTCTGAAAGAGTTACCCCTCTAAGTAATGAGGTGTTAAGGACGCTTTTCAATTTCAATGTCG  
GCTAATCGATTTGGCCATACTAATACTCTGAATAGCTTTAAGAAGTTATGTTTAAACCATCGCTTAAATTTGCTGAGATTAACATAGTAGCAATGCTTT  
CACCTAAGGAAAAAATTTTTCAGGGAGTTGACTGAAATTTTATCTATTAATGAATAAGTGTACTTCTTCTTTTACCTACAAAACCAATTTTAACTTT  
CCGATATCGCATTTTACCATGCTCATCAAGACAGTAAGATAAAACATTGTAACAAAGGAATAGTATTCCAACCATCTGCTCGTAGGAATGCCTATTTT  
TTTCTACTGAGGAATATACCCGCTCTTTCAATAACTAACTCAACATATAGTAACCTTAAATTTTATAAATAACCGCAATTTATTGGCGGCAACAC  
AGGATCTCTTTTAAAGTACTCTATTACATACGTTTTCCATCTAAAAATAGTAGTATTGAACTAACGGGGCATCGTATTGTAGTTTTCCATATTTAGCT  
TTCTGCTTCTTTTGGATAACCACTGTTATTATGTTGCATGGTGCCTGTTTATACCAACGATATAGTCTATTAATGCATATATAGTATCGCCGAACGATTA  
GCTCTTACAGCTTCTGAAGAAGCGTTTTCAAGTACTAATAAGCCGATAGATAGCCACGACTTCTGAGCCATTTTTCATAAGGTAACTTCCGCTCCTCGCTC  
ATAACAGACATTCACTACAGTTATGGCGGAAAGGTATGATGCTGGGTGTGGGGAAGTCGTGAAAGAAAAAGAGTCAAGTGCCTGCTTTCATCACTGC  
TATCTTCTACTGGTTATGCAGGTCTGAGTGGGTGGCACACAAAGCTTTGCACTGGATTGCGAGGCTTTGTGCTTCTCTGGAGTGCACAGGTTTGTAGC  
AAAAAATAGCGCAAGAAGACAAAAATCACCTTGGCTAATGCTCTGTTACAGGTCACTAATACCATTAAGTAGTTGATTATAGTACTGCATATGTTGT  
GTTTTACAGTATTATGAGTCTGTTTTTATGCAAAATCTAATTAATATATTGATATTTATCATTTTACGTTTCTCGTTTCAGCTTTTTTATACTAAGTTGGCA  
TTATAAAAAAGCATTGCTTATCAATTTGTTGCAACGAACAGGTCACTATCAGTCAAATAAAATCATTATTTGATTTCAATTTTGTCCACTCCCTGCCTGT  
CATCAGCACTGTGATGCCATGGTCCGACTTATGCCGAGAAGATGTTGAGCAAACCTATCGCTTATCTGCTTCTCATAGAGTTCGCAGACAACTGC  
GCAACTCGTGAAGGTAGGCGGATCCCTTGAAGGAAAGCCTGATGCTTTTCTGCGCCGATAAATAACCTTGATGATGCGCGGATGAAAGCGGTTT  
CGCAGAGTAGATGCAATTTAGTTTCTCGCCAAAGATCTTTGCAATTTATCAAGTGTTCCTTCAATGATATTCCGAGAGCATCAATATGCAATGCTGTT  
GGGATGGCAATTTTACGCTGTTTTGCTTGTCTGACATAAAGATATCCATCTACGATATCAGACCACTTCAATTTTCGATAAATCAACCACTCGTTGCCCGG  
TAACAACAGCCAGTTCCATTGCAAGTCTGAGCCAACATGGTGTGATTTCTGCTGTTGATAAATTTTCAAGGATTCGTCAGCCGTAAGTCTTGTATCTCTTAC  
CTCTGATTTTGTGCGGAGTGGCAGCGACATGGTTTGTGTTATATGGCTTCACTATTGCTCTCGGAATGCATCGCTCAGTGTGATCTGATTAACCTG  
GCTGACGCCGCTTCCCTGCTATGATCCATTGAGCATTGCCGCAATTTCTTTGTTGTTGATGTTTCAAGTGGAGCATCAGGCAGACCCCTCCTATTG  
CTTTAATTTGCTCATGTAATTTATGAGTGTCTTCTGCTTATTCTCTGCTGCCAGGATTTTTCGTAGCGATCAAGCCATGAATGTAACGTAACGGAAAT  
ATCACTGTTGATTCGCTGTCAGAGGCTGTGTTTGTGTCCTGAAAATAACTCAATGTTGGCCTGTATAGCTTCAAGTGTGATTGCGATTGCGCTGCTCTGCT  
AATCCAAACTTTTACCCTGCTTGGGTCCTGTAGCAGTAATATCCATTGTTTCTTATATAAAGGTTAGGGGGTAAATCCCGCGCTCATGACTTCCGCTTC  
TTCCATTTCTGATCTCTTCAAAGGCCACTGTTACTGTTGATTTAAGTCAACCTTTACCCTGATTGCGGAACAGATACTCTCTTCCATCTTAAACCGG  
AGGTGGGAATATCTGATTCCCGAACCCATCGACGAAGTGTTCAGGCTTCTGGACGTCGCTGGCGTGCCTTCCACTCTGAAGTGTCAAGTACATCGC  
AAAGTCTCCGAATTACACGCAAGAAAAACCGCCATCAGCGCGCTTGGTGTCTTTTCAAGTCTTCAATTCGAATATTGTTACGCTGTCATGTCTATCTG  
CGCCATATCATCAGTGGTCTGAGCAGTCTGATGTTTCTCCGCTTCGATAACTCTGTTGAATGGCTTCCATTCCATTCTCTGTGACTCGGAAGTGCATT  
TATCATCTCCATAAAAAACAAACCCGCTAGCGAGTTCAGATAAATAAATCCCGCGAGTGCAGGATGTTATGTAATATTGGGTTAATCATCTATATG  
TTTGTACAGAGAGGGCAAGTATCGTTTCCACCGTACTCGTGATAAATAAATTTGCACGATCAGTCAATTTCTGCACATTGCAGAAATGGGATTTGCTTCA  
TTAGACTATAAACCCTCATGGAATATTGTATGCCGACTCTATCTATACCTTCACTACATATAAACACCTTCTGATGCTGATGAGACAGCAAGACCCGG  
ATCTGCACAACATTGATAACGCCAATCTTTTGTCTCAGACTCTAATCACTTATGATACTTATAAACTCCTTGAATGATGCTGTTTCACTAAACGGTAT  
CAGCAATGTTTATGTAAGAAACAGTAAGATAACTCAACCCGATGTTTGTAGTACGGTTCATCTGACACTACAGACTTGGCATCGCTGTGAAGACGA  
CGCGAAATTCAGCATTTTCAAGCGTTATCTTTTACAAAACCGATCTACTCTCTTTGATGCGAATGCCAGCGTCAGACATCATATGCAGATACTCACCTG  
CATCTGAACCCATTGACCTCAACCCCGTAATAGCGATGCGTAATGATGTCGATAGTTACTAACGGGCTTGTTCGATTAAGTCCGCGAGAACTCTC

**Construct 4, 42% GC content (excluding handles):**

GGCCGCCGAAATTTTCTCATAATAAAAGTAAAAGCCGATCTCTCGTACAGCAATTTTCACTTGAGGTACGGACGGCTTTGTAAAGATAGGATCAATAA  
TTTCTATTTTAGGAGCTAAAGCCAGTTCATATACTTTTTCGATATCAATTTGATCATGAACAAGCTTCTCAACTGTTCAAAAAACGGTGTAACTCTCCTCGT  
TCAATCGACGGAATGAGCCCGAGGTGACGTTCAAGAAATCGTAAGATCATGTTTCTTTTCAAGTAGCCTACTACAGGGATATGACATTCTGCTCAATCGCT





ATGTTGTGCTGGAAGTCGCTGTATGTCCAAAAAGCTTATATGATAATGTCGTAGCTGATTTAGTTTCTCAAGCGAAATCTATTAACAAGGAAATGGATT  
AGCAGATGAGACGACAATGGTCCGCTTGTATCTGCGCAGCAGCAAAAACGAGTGAAAACCTATATTGATAAAGGAATTGAAGAAGGAGCGGAAAGTACT  
CGCAGGAGGAAACATTTCCATTTGATCAAGGCTATTTGTAGAACCAGCTATCTTTGCAGATGTCGATCATTGATGACGATTGCTCGTGAAGAAATCTTCGG  
TCCGGTTGTAGCTGCTATGCCGTTTACGATCTTGATGATTTGATTGCCAAAGCAAAATGATACAGCATATGGTCTAGCAGCGGGCGCTGGACACAGGATT  
TAAAGAAAGCACACATATTTGCTCATGGTATTAAGCGGGTACAGTTGGGTGAAGTGTACAACGATTTGATGACAGCAAGCCGTTTGGAGGCTATAAA  
CAGTCGGGAATTGGTCTGAAATGGGAAGCTATCGCTTGATAATTACACTGAAGTGAAAAGCGTATGGATCAATATGGAATAAAGTAAGATTTTTGT  
GAAAATCAATAGCATATCTTTGTGTGAAAAGAGTAGTCTTTAGTGACTACTCTTTTATTGTTAAGTCCCGCATTTTTAGAAAAGGAGTGATAACATTGC  
CGGTTATACAGGGCCCTCGTGTATAAGCTTACCGGTCACCTGCAAAAAGTTTAGAGAGAACCCTACTGGGTTTTTTGGAAAACCTTGACTCAGTATGGAGAA  
ATTGCAACATTTAGAGTTGCGCACAAACGCTTTTATGTAACGAGAGACCTCAACTTATTAAGATGTAGTATTACAAAACAGCAAGCGTTTTCAAAAAATT  
AAACTAACGCACATGTTTTAAACGCTGCTAGGCGAAGAAATGTTATGGACAGATGAAGCATTATACATGAGCCCCATTCAACCTCACAACTTAAACAACA  
TCTAACTATAATAAGGAAGTAATCGCAAAAATAATTGAAAAGCATAACGAAACGTGGGAAGAAAGGGCAGCTTCAACGATAGTAAAAGACATAAGACA  
GATAGTCGTAGCTGACTCCTTCAACTGTATTGGCATTTCGATTGAGGATAAAGATAAAATTTCACTATGTTCAAGCGCTTATGAGAAAAAAGAAAAGTT  
AGGCAAAATTTATATTCGTCTACCTTTGACCAGCCTGACTCAGATGAGCAGCTAGAACAACTCTTTTTGAACGTGTTCAAATCGCTGTTCAAAACAAAAC  
CGAAGGAAATGATTTACTGGAGTATATTTGAATCTTTCGGGAGAAGAAATCGATGAAAGAGAATATACGAACAGCTAAAATCTATATTCCTTCGATGT  
ATGAAATGATTACGCACGTATGACGCTGGTCTATTCATTTACTGTCTCAAAATACTAGGGAGCATCTCAGCTGCATAAAGAAATCAAGCCTATGCTAGCG  
GCGAATCACCTTCAACCAAAAACCTGACCTATATGCGTAAAATAATTGCTGAAAGCATGAGGTTGTATCCGCCTTTTGCTATTGGGCGTCAAGCAGCTG  
AAGATATACAAATAGATGGCTATAGTATTAAGAAAGGGGAGATTATGTTAATTAGCCCTTATATGATGCATCGCCATGAAGACTATTTTTAGAGCCAAAGT  
GAATTTTTACCTGACCGTTTCGAAAAGGAGGGTCCATTGATGTTCCAAAGCTATATGATATGCGCCTGGGATTGAGCATCAAGCGGAAAGGGGCGATGG  
ACTATATCACTGAAATAGTAACCTTTTTATGTCAGAAATGACAAAAGCGCTTTTTATTTGACTGACTAAGCCCAATCTATTGCTCCGATGGCGGGCGTAA  
TGCTGAATATGAAAGAAGAACTGAATGTGAATGTTACAAAAGTTACACGAGCTTGAATGAATGGGAATCTTTCCCTCTTTATATCAGGCTGTCAATTT  
ATTGACACATCTGCTATTGAGATTTATCATAGGGTAATATTTGATAGAGATTACTGAAGGATTTTTAGAGGGGACTATGGATAAAAATAAACAAGTTGG  
TGTGCTAGTTGAAACATCATTACTAACGCAAGTTACGATTCAAAGTGAAGTGACTATGATCCAGTTGAAGTTACGAACAAAACAAAAGAGTGGGTACTT  
ATTGGTAAAGGAAACTATGCCGCTGTTTACGCACGAAAATTTACTGAAATTTGCTGAAAAGTATACGGAAGAGAAAATTTATGGTGTAAAAAAGAAAG  
CGCAAGTGTATAGAAAGCTGGGCGTTACCCAGCTTATTCTCAACTTTTTATGAGGAAAAGACGTAATTTGTTTTAAAAAGGCTTACAGCGTTACACTGT  
ATGATGCCGTCAGCGGGGCATAAAGATTCCAGAACAAGTCATAAAAGATGTGAATAAAGCTTTGGACTATGCAAGAAGCCAGGGTTTTAAACCATATGA  
TGTGCATGGTAAAAATGTCATGATGAAAGATGGACGAGGGTATGTGGTGGATATCTGACTTTTTATAAAGAAGGTATTGATAAAAAATGGACAGACCTT  
GTAAGAGCTTATTACCTTTTTATCCGTTTATTGATAAGTACCATATCCGCTTCCGTAACCCGCTTTTAAACGTTATCAGAAAAGCATATCGTCTATATCGTAG  
AATCAAATCAAAAAGGAGTTCCGCTAAAGGAACTCTTTTTAAGATGAAATACAGCGCAATACATGCTGCTGCTCAAAAGTTGGTTTTAATTTGAATAGA  
ATGTTTTAGTATTTAGATTGATAGACAAATTTAGCGTATGTTAAGGGAAAGAGGATGTAAGAAAGAACGTAATCTTTTATTAGCATAACGTATCACC  
TGTTCTTATAAAAATAAAGTACGTGCGGAGATTTAGCGTGAATGCTTTTTGTTAGTTGATTGTAAACTGGATAATCATTAAATCAGTGTCTTACAGTATT  
TTTCTAGTAGCATGATATCACCCTCATTTTGTCAACTCATTACATAATCTTAATAATAAAATTTACAAATGTCATAAAGAGCGGAAAATAAATGGTAAGAC  
TGTTCTTTTTATATGTTGATAAACAAGACGTGATAGAGGTGAGTAAAGTTGAACATTAACGTCGGATTTGCAATTTTAGCTGATATTGATAAATAGATGA  
CGGCTGCTATTTATGTGAAAATCAAATTTAGCGGATTATAGCTGGACCTCAGATATCTTTATGAAAAGTTAAAAAAGTGTTTTTATAATAGAGAAAAG  
CTGTAATTTGAAATATGATTATAAAAAGCTTAAAAATCTATGAAATAGTGCAAAATAAAGATGAGGATAAAAATACAAAAAGAAAGAACAGGAAGTT  
AAGGATAGGAGAAATACATATGGATAAAAACATCTTTTATTGGACTGATTTAGGAATAGCCCTCTTATTGATAGGCATGTTTTCAAAGGGGTTAATCCATC  
TGTGTTAGGAAATCCGCTGCTATTTAATTATTATTGTCGAAACCTGCGGAGCAGTAGTGATTGCATTTCTTCAAATGAAATCAAGAGAGTCCAAAACCT  
GTTTGGTGTCTGTTTAAAGAACAATAAATGCTGCAGCCGTTGATTTAGTATCCATGTTTTCTGAATGGGGACAAGTTGTTGAAAAGAAAGGTTACTACT  
ACTTGAAGCCCAAATTTAGTATGATAGTACCTTTCTTAAAAAATGGTTTTGAATTTAGCTATTGATGGTCAAAGTGCAGATTATATACAGAGCGTGTGTC  
TGAAGAAAATTTGATGCTATTGGAAGAAAGACATCAAACGCGGTGCAAGTATTTTCGCTTACGAGGTACATATGCTCAACTCTGGGTGACTTGGAGCTGTTA  
TAGGGTTAATTGCTGCGCTGGGAACATGGAAGATACAGATACGCTAGGACATGCGATCAGCGCGCGCTTTGTTGCTACGCTTCTGGTATTTTTACTGGG  
TATGACTATGGCATCCGTTTCAAATAAACTAAAGCGTAAATCGAAACATGAAGTAAAGGTAAGTATATGATGATCGAAGGAGTGTCTTCACTTTTAGA  
AGGAGAAAACACAAAAGTAATTGAGCAAAAGCTGGCTTCTATTGCAACAGCGGAACGTAAAAAGCTTCTTCAAGAAAGTGAAGTGGGCATAAATGAG  
TAGACGCAGAAAACGAAAGCATGAAGAGGACCATGTTGACGAAAGCTGGCTGCTTCTTACTCAGACTTGCTTACACTTTTACTGCTTTATTCATTGTATT  
GTTTGAATGAGCTCAGTGGATGCGCAGAAATTTAAGAACCTTTCTCGCGCATTTAATGAAGCGTTCGTTGGAGGAACGGGCGTGATGGAATTTCAATCTC  
TGCAGGAATCTGAAGAAGCGTTACGCTTCAAATACTCTGCAGTAAAAGTACGGAAAAACAAAATGAAGTGGAGACAGCCCAATCAGTCTCCTGC  
TTCTTACAATCGTTGACGAGCGAACAAGGAGCAAAACCTTTCGAGAAGCTGATCAAGAAGAGCTTACGCAAAATCAATCTAAAATTAATGCGTATATTA  
AAAAGAAAACCTTAAACAATCAATTACAGACTTCGCTAACCAGGAAAGGTCTTAAATTTCCATTTCGAGACAATGTATTGTTGATTGGGAAGAGCACAA  
GTTCCGAGTGAAGATACAAAAATCGCAATGATATTTAGAGCTTTTGGTGAATGATCCTCCTGAATATTTATTAGCGGTACACCCGATAACGTACCT  
ATTCGCAACGCTGTTTTGAATCCAACCTGGGAGTTAAGCGTATGAGAGCAGTTAACTTTATGAAAGTTATCTTAAAAACGATAAGCTTAATCCAAGCAT  
GTTCAAGTGCAAAAGGATTTGGAGAGTTCAAACCGGTGACATCTAACATACAGCAGAGGGACAAGCGAAAATAGGAGGGTTGAAATATTGATTACTCCT  
CGTACAATTAACAGCCGTAAGGAGTCTGCTTTACGGCTGTTTTCTATGTTTATAAAGCTAAGAGTCTTCTTTTTCAAAGTTTCTCGTACTAATCTT  
GAGATCCATTTCAATCAAAATCAAGTCAATGAGAGCGCTTAAAGAGACATCCGCTGTTTTTTCTTATCATTGGACTGCAAAATATTGCACGATACCCATTG  
TCTTCAACTTGAAGTACATAAAACCGTCCGTGCGTAAAATCAATCAAAACTTTGTAGGTTGCTCCATTGAGATTTTTATAAACATATCCCCAGCTTCGCTCT  
GGTGAGCGTCTCTTATTTAGGGCAGCTGATTAATACTCTGTAATATACTTTGTGCTTAAATCATAGAGCATCATGTGACAGTCTCTCTATCTATAGAC  
GTGCTAGCAGTAAAGATATATTTGTATAACAAGTATACTCAGCTGAATGGAATCGTAGACTATTTTTTTAGACAAGCAGAAACGAGTTAAATGAAA  
AAGACAGTTTAAATTAGCTCAATCATTCCGCTTTTTTATACTGTAAGTAAATGCGTTAAATAAGGAGGAAAAAATGAGACGAGTAGGAATAGTAGGTGCT  
GGAATGACGGGCTTACAGCAGCGGTGAATTAAGAAAGAAAGGAATAGAAGTCTTTCTTCTGATAAAGGTAAGTGTAGGGGACGAATGGCTACT  
CGAAGAGTAGGAGATGAAAAGCAGATCACGGAGCTCAATTTTTTACAGTGAATCCGATGAATTTCAACAAGACGTAATAAATGGATAGCTGATAGAA  
AGGTTAAGAAGTGGTTGGTGACCATCACCTCGGTATCAAAGTATGAATGGCATGAATGCGCTAGCTAAATATTTAGCTGAAGATCTACGCGTATACGTG  
AATCGAAAAGTTCAAGCCATTGATTTCAAACGGAAGGTATCAGCTGTATACAGAAGAAAATGAGATTTTTGAAGCGACTGATATCATTCTACACCTCCG  
TCTCCTCAGGTTATTGAGTACTTAATAATAGTAAGCTGCAAAACGGACCAATCAATTTAATACTGAAATTTAGTCCCTGCTTGGTGTCTATCGTGGAGC  
TTTACACAGAGATGCTGTATGGTGATCATGGTCAAATCACGAATCTCTAGCACAAATCAAAGAATCGTTAATCATGAGCAAAAAGGAATATCAAAGACG



CCCATTCTTAGCATATATATGAATAAAGACTGGTCAGAAAAACATTTTATGATGAACATGAACATGAGCTGCTGCGGGCGATAAAAAATGAAATAAAAAAATG  
GATAGGTGCAAAATCATATTAAGCATTTCAGTTAAAGAAATGGCGCTATGCAGAGGTTGAACAAGTTCTTCATCAGCCCTTTGCTAAAAATTATGCCGTCGCT  
ACTGGTGGCAGGAGATGCTTTTTAAGAAGGGGAAGACGAAACAAATCACTCACGGTTAGAGAGCGCATATTTGTCAGGGAAATCGGCAGCCGCTGAATTA  
ATGGGAAAGAACATCTAGAAAAAGGGGACCAAGAAGTAAAAATAATTGGATAATGAAACAAACGTGGAAAGATTTACTGTTTATTTCATTGGCCTGTA  
GATCCGACATTTTTGGCTTTTATTGCCTAGTCAGTTAGAGCCTGACACCTATGATGGTCAAGGATGGATTGCACTTTGTCCTTTTACGATGACAGACATTC  
GATTCAAAGGAACGCCGAGTTCCCATCTTTTACGGCTATATGAGCTGAATGTGCGTACATATGTTACATATAAAGGGGAAAAAGGCGTTTTATTTTTTA  
GTTTAGACGCAAGCAATCCGCTAGGGGTATGGATTGCTCGTCAGTTTTTTCATTGCTTATTACCACGCTACTATGACATTCACAAAACTCAGAACCATAT  
TTCTTTTTCAGTCAGTTTCGAACGCACAGAGACTCAAAAAAGAGCGAGTAAAGCTTACATATAGAGGATTTTCTCCGCTCTATCGCAGTAGAAAAAGGAAAT  
TAGCTCATTGGCTTACAGAGCCTACTGCTATTTTACCCTCATCAAGGAAATGTCTACAGAGAGACCTTTATCATGATCCTGGGAGCTGCAAAAAAGG  
GAGTGTGAAATAAGAGATGATTCTATTACTCCGCTTTTTGCTCCCGCGGACAATCGCGATTAATTGTCACTATGCAAAAC

**Construct 6, 38% GC content (excluding handles):**

GGCCGCCGCTAAACTGTACAATTCGAGCCGGTTAGGATCACTCAACGCATGTAATAAGCGTTAATTTAATTCAGATTCGGTGGTTGATAAGGTTT  
TCTCATGCTTAAATATAACACAGCTCTTTTGTGTATCAATGTTGATAACTTTGAACTAAATCCTTGCACTGTTATTTAATCGGTTATAGTTTCATTGT  
TCGATGATTCGAACCTTATCTTCAATTTAATCGTAAATGAATGAAAGATTAACCAACAAACAAATAATAAAGCACCATCATTATTAAGGAGGAATCA  
CCCATGATTCATTTACAAGCTTCAATGAAAGTTAACCCAGCAAAAAGAGAAGAAATTTTGAAGAACTACAAGAACTAATTAAGCATTCTTTACAAGAAGAA  
GGAACAGCAACTATCAACTATTTGAGAGTGTCTTTTACACCTAACACATTTATGATGATTGAAGAGTGGAAAAGCGAAGAAGCAATTAAGCAGCACAAATA  
ATCAGCTCACTTCAAAGTTTTGTAGCATTGCTCAAATGGCGTACTTGTAGCACCTTTAGATGTAAAAACATTACAAGGTTAATCATAACTTTTGAAG  
GATGACGCATCATGAATGAAGCAATTCGTAACATTCAGATCATCGTTCTATCCGTCAGTATACAGACGAAGCAGTAAGTGACGAACATTTAGATACAAT  
ATTCATCTGCTCAGTCAGCCGCTTCTTCTAATGAGCAGCAAGTAACTATTATTAGCGTCAAAGATAAAGAAAAGAAGAAAAACTTTAGAGCTTGGC  
GGCAACCAAGCGTGGATTGACCAAGCTCCTCTATTTTAACTTTTGTGCGATTTTAACTGTCGTAAGATTGCAGCTGAACCTAACGATGCCCTTGGCG  
TAACCGTAGGACTTGAATCAATTTAGTCGGGGCACTGATGCTGGAATTTCTTTAGAAGCCGCAACAGTTGCAGCAGAATCACTCGGTTTAGGTACAGTC  
CCAATCGGAGAAATTCGACAGAAAGCGCTAGAAGTCAATGAACTGCTGCTGTTTACCAGGAACTATCCAGTAAGCGTCTTGTGGTTGGACATCCGTC  
AGATCATTCTGCGAAAAAGCCTGATTGCCACAAAGCTGCTGTGACCACTCGTGAAGCTATAATCACGACTTGAAGTCAATGATTCAAGACTATGATGCTGA  
AATGGCAGAGTATATGAAAAAGAGAACAACCGTGTGATGACCGCAACTGGTCAAAAAGTATCAGCTATTTACAAAACCTTTTATTATCCAGAAGTTC  
GAGCGATGCTTGAACAAAGGATTTAAATTCGAATAACCAAAAGCTGCGATGAACATCGCAGCTTTTTTATCTACTTTAACAGCGTGTGAATAGACTAA  
AAGTAATACTCAATAAATGAGGTGTTGATATGGAGTTTATTTAATTTGTAATTTCTTTAAGTGCAACCCGACGCTTTTTATTGGTGCCGGCTTTTACAAA  
AAAGCACACACTTCAGTAACCTTACTTTCTCCTTTTCTCCTTTGATGTCGCGACTTTTCTTCTGCTAATCCACATATCGGCGTTTTGCCTGGGCTATT  
CGAGACGGTCTTCTATTGTCGCGCTTCTTTTCTTTTATTTAACCTTCACTTTAAACAGATGGAAAAAGCTTTTGTTTTTTCTTATTTTACTGTCGATTG  
CTCCTTTTCTACGTCGATATGACGACTTCAGCATACTGATATAGATGCCAATATGGGCTTGGCCTAGGCTTTTTATTGACATGGCTTAAACAGCTCT  
GTACAATTTTTGGCTATTCTCGATTTTTCTGTCAGAAATCTCAGTAAACATATCAAAGTTAAACAAACAAACGAATAGTTGATTTTATTAGTGTACGCTA  
ACAACGTGACAGTCTTCTTTTACATAAAGCTGTGATACTAAAAAGGAGTGATCTTGTGAAACGACTATTGTAATGGCAGCAGTATTGCTTCTT  
GGCACTTAGCCGATGTTAGTATTTGCCGCTGAAACACCTCCTGCTGAGATGAGCGAACAGCTCAAATGCAAGGTTCCGATCGTTCATGCTTACC  
ATGCTCCGGCTGTAGACATTTTGTGGATGACAAAGCTTTAGTAGAAGGAGCAAAGTTAAAGATGTCTCAACTCCTTGCCTTTGTCAGCCGGTTCTCATA  
AAGTAGAAGTATACGAAGCGAAGCAAAAAGGAACAAAAGATTCCATCATCGAAGCTACCCTTGTGTAGACGGTGGAAAATCGTATACAGTGGCCGCTGT  
AAATAAAGCGGAAAATCTTGAACACTACAGGCTTTTACGAATAATAAGCAAGGATGGATGGAAAAGCAAGCTTACGTTGCTCATTATCTCCTGATGCTC  
CTGCGGTAACGTAAGTCTAAAGTCTGCTCCTTTATTTAAAGAGCTGCTTTTAAAGCAATTTTCAAGTTTACAGTTATCAAGTAGTAAATCCGGGTCGATGATC  
TATCTGTTTCCACAGCAGATGGAAAAGAAATAAAGTCTTCTGGAACAAATCTTCAAAGCGGTAAAAACATAACGCTTCTCGCAGTAAATCTTCTGACA  
AGCTTGAGACCATTGTTTTACAAGATAAATTAATAAAAACGTCATTTCAATGAAATGACGTTTTTTATAGACTGCGCTGAATGAATCTTCTTTTTTGTACT  
CATAGGTAGAAATATCGTCCACAATCGTTTTGAAAGCTGATTTTACATCTTCAATTTTTTCTAGCACGTTGCTGAGCGTAACTGCTCCTGAAATTA  
ATTCGTTTCCAGTAAGGAGATTCACTGACCGTTACATACACATGACTTCTTCTAGCATCATGTGGAATGAGCCTACGGGCAATTTTATGCTGCATAATTG  
GAGGATAGTGTGACGCTGGAACGCTTCTTTAATAAGACAACATCTTTTTCCGCTACATATACGTGAGATTTATTTTTAATATAGCCGCACTTCATT  
ATGCTTCTCGCGTTTACTCCGATTAATAATCAACGATTGGTGAACCTGCCAATCCTGGAACGAGCTGCTTCAAATATGTTGATGTTACTGAAAAG  
TCTTTTAGTGTATTAAGCAACGCTTCTTTTCCATTTGATACAAAAGCGACCCTTTGTTTCACTACTGAACAATCTTTCGATATCAGTTCCACCTTTCACTT  
TTTTACTGTATCATGTTTCAAATAAAAAGAAAGAAATTTTCTAATTTAATTTTAGTTTATGCTACGAACTTACAGCAATATAGACAGGCTTTTTATTA  
TTTTATATATTTTTGTTATTTCTATTCTAAATGTTTCATAATTGTTGATGTTTCTCCTCCAAAAGATAGATACGATTTTATCTGCTATCTCCTCTATCCTATT  
CACATCCGGCTGCTTATACTATTTTACATTTTTTCTAGTATAAAAAAGCTCCTCAAATGTCGATAAAACAAAGGACTAAATGCTTTTAAATATCTATATTCC  
ACCTTAAACATAATTATTTTTACATAATGTAATAATTTTATCGGTAAGGATGGCAGATAGTTCAAATTCATTATACAATTTGAATTTGACATATAGTATGAT  
GGATAATATCGGATTATGAGATAATAGTAGATTTCACTCAAAATTTGGACTATTTGCGGATATATGCTTTGTATACCAATAACCTTATGTTGAAATTTGTA  
ATTTGCAAGGAGGAAAAATGAGTAAAAAACATGTCATGTACACAGCCGTTTCTTCTGTTCTTTAAGCTTCTTATTGCTTTTGCCTCAATTTGATGACAGATG  
CAGTGAATCGCCAAAGTAACTGCTACATCGTTAAATGTACGTGCAACGCTAGTACAAGCGGTGCTATCGTTGAAAAATAACGAAGGGGAAACACCGT  
TGATATAGTAGATAAAGCAAAGGATGGGCTAAAATACCTATAGCGGTAAAGAAGCTTGGATTTCACTCAATACATAAATAAAGCAACAAACAAACAGTA  
CGTCTACCCGAAATTCGACATCGAAGTCAGCGGTGTTAATGCGAGCTCATTAAACGTTCTGTTCTTCTGCAAGCAACGCGCATCCATCGTGACAACTAC  
CGCGCAATTCAAAAGTAAACGTTGTAAGTAAAGTAAAGCGGATCTTGTGTCGAGGTTAAACCGGATCGGGTCAAACCGGCTGGGTGGCGAGTCACTACTAC  
AAGCAGGCTGCTTCTTCTGCGCCAGCTAAAGATTCTGGTCCACATCATCACAGTCAGCGGCTGTTAATGCCAGTTTATTGAACGTCGCTTCTTCTGCAA  
GCACAAGCGCTCCATCGTAACGAACCTACCGGTAATTTAAAAAGTAAACGTTGTTAAAAAGTAAAGCGGATCTTGGTGCAGGTTAAACGCGCATCGGGTCA  
AACCGGCTGGGTGGCGAGTCAGTATTTACAAGCAGGCTGCTTCTTCTGCGCCAGCTAAAGATTCTGGTCTACGTCATCACAGTCAGCGGCTGTTAACG  
CGAGCTCATTAAACGTTCTGTTCTTCTGCAAGCACAGGCGCTCATCGTACGAGCTTATCGCGCAATTCAAAAGTAAACGTTGTTAAAAAGTAAAGCGGATCT  
TGGTGCAGATTAACCGGCTCGGTTCAAACCGGCTGGGTGGCGAGTCAGTATTTAAAGCTGATTCTGGACAGTCTTCAACCCAGCCAGTCGATTCA  
AATTACAAAAGCTCAAATTTGCGCAGTCAGCCGAGCTTAAAGTGGCGGAAATCATTGCTGATGCAAAAAGCAGGTGAACGATTCAAAAAGTAGCGGAAACG

AATGACTGGGTGCAAATTCAGTACTCTGCAAGTCAAACAGCATGGGTGTCAAAGGGTTAACAGCTGCGGCTGGTTCTACAACCTCAGCTAGTTTGCCTTC  
CTCATCTGCTGCTTTAAAAGATAAAATTTATGTAGTAGACGCTGGGCACGGCGGATATGATCCTGGCACTTCAGGCAAGTCAATCGATTGAGAAAAATTTAG  
CGTTAAACAACAGCAAACTTGTGGCAAGCCGCTAGCTAATTTGAGAGCAAATGTTTTATGACGCGTTCAAACGATACTTTTATCTCACTAAGCGGACGAG  
TGAACGTTAGTGAAGCAAAGCATGCAGATGCATTTATCAGCATTACTATAACGCTTCTACTTTCATCTTCTGCAAAACGGCATCGCATTTTTATTACAGTGA  
AGCCAAAGATAAAGAATTAGCAAAATACATTCAGAAAGCATGGCTGAAAACGCGCCTTCTATGAAGGATATGGGGGTTCTGTTTTGGAGATTATTATGTTA  
CTCGAGAAAACAACCAGCGTGTGACTTCTTGAACAGGCTTTTTATCAAATGCTCAGATGAGCAAATGTTTCTTAAACGCGTATCAGCAGCAAATAT  
CTACAGGTATTTACCAAGGAATTGCTCGATATTTGAGCTAATAAAATAAAAAGCCCTCATAATGAGGGCTTTTATACTACCAGCTTGTCTTTTTAACACC  
TGGAATTTGCTCTTTGAGGCCAATTCCTAAAAGCGATGCGTGACATTTCAAATTTCTAAGATAGCCTCGCGGACGACCGGTAACACGGCAGCGATTATT  
TAAGCGGGTTGGTGAAGAATCTAGGCAATTTTTTAAACGCTTCGTAATCTCTTTTTCTTCAAGCTTGGCGTAATGCGCATATCTGCTACCATCTCTT  
GACGCTTTTGTCTTTCACAACCTTTGATTTTTAGCCAACTTTGTATCTCTTCTGTTTTATCAATTTTTATTGAAATACGTAATCATTACGATTTAATTA  
TTTTGAGCAAGTTACTTTCTAAATTTAATCATATTTTCTCATTTTTTCAACTGTTTGTCTTCCATGCTTACATGTAGCCTACCCCGAGCTGTGCATAAACAT  
AAAAAAATTTGATGTCAAATGTAATTAATCTGCATCTCTATATCATACAAGAGCCCTACATATTCATATTGAGGAGGATTGTATTTACAGATAAT  
ATTTCAATAATATTACAGTTCATTTACATATAATAACTTCGACAAATTTAGCGGTTATCTAGTATATAATCATCTTAGAAATCCAAAAATAATTTTTGCGT  
ACTCAATAAAATATAAAGTAAAGGTGATTAATAAATGAAATCGACTGGTATTGTAAGAAAAGTAGATGATTAGGTCGTATCGTAATCTCAAAGAGTTA  
AGACGTGTTCTGAAATAGATGTAAGAGATCCTGTTGAAATTTTTGTCGAAACAGATCGAATTATTTAAAGAAATATGAGCCGACCGTGCTGTGCGGATT  
ACTGGCGAAGTATCTTCTGACAACGTAACAATCGCAGATGGCAAATTAACCTTAAAGCCGGAAGGTATGGAGTTATTACTGAAAGATTAAACACAGTAA  
TTTCTAATAAAAAGAAAAGCAGCTGCTCATATGACAGCTGTTTTCTTTTTGTTAAAGTTTTTCTCGCTTCTGAGTTTCAGATTGCTATACTCAGAAAGCGAAA  
TACATAATAAAGGAGCCTTTTATCATGACAGTTGAACAAATTACTCATCACTTTTTAGCACATCGAAACGTAACATAATGAATTAACAAAAATTTGAAGCA  
GGTCACTACGAATACAAGCCTGCCCGACATCTATGTCGCTTTTACTTATCTACGCATATTTAAACATCTTTTTATGCAATTTGCATCAGTGGTAAAAATCCGG  
TGATTTATCTCCACTTGGTCAAAGGCTGATTTTAGCGGTAATCATTATCGGACCTTGCAGCTGAATATACGCAAAAAACAGTAGACGTATTACGTTCACT  
TAGAGAAGATGATTTAAACAAAACAATTGACACCACTCGACGCTTGGAAAGAAAGCTTCCCGGAAGTCAACTCTTACAATGGCCATTGACCATGAAATTC  
ATCATAAAGGAAATTTATACGTCTACGTACGTGAGATGGGTACATACAGATCTTCTCTATTTGTTGAGTTCCGTTAATAAAATAGTTGCTGTTGTAAGCGCC  
CAAGCTAGAAGTTTGGTGGCCTTTTTCTTTGCAAGTTTTCGGCATAATAAGTGAGATATATGGTATAATTCTATCAATAACTTCATATCTACTATTCAAAGCTT  
GTTTCTTTATAAAAACGATAGTCATCATCTTTTACAAGGAGGAATCACTTCATGAGTCAAAGTAAATCAACAAAAAATTTGCTCAAGTGTATCATCTTCC  
GTTTGTCTTCAATTTGGAGGAAGTGTATGAACCTTCTTCTCCTCAAGCTGGCGAACAATTTTTAGATATTGGCTGCGGCACTGGCGAATTTATTTGCGAG  
CTCAATAAGCTTATGTCGTCGCAACGGGATCGATTGCTCTGAAAATATGATTGAACAGGCTGTCATCAGTACCCAATTTATCTTTGAACAGTTAAAT  
GCCCTTAACCTTCTTATTACGAACAATTTGACGAGTTTTTTCAAATGCAACTTTACACGACATCCGTCCTTCCCTCACCTTGTCTTAAAAACATTTACAATGC  
TTTAAACCAAATGGCCGATTTGTAGCAGAATTTGGGAAAAGGAAACATGGACGAAATTTTACAGAAATCATTGCTCAATTTAAACGTTTGATATCCC  
TTATAACGATGTAGATTTCCATGGTACTTCTTCTGTAGCTGAATATCTTCTCTTTGGAATCACAGAAATTTCAAGTACCACGGCTATTTCACTACAGCC  
GTCCCTTCTGTTAAAAGGGGAAAACGGCTTGCCTAATTTGGCTGAAAACAATGCAGCCCTCTTTTTGCTCAGTGCAGCAGAAACTAAAAATGTCTC  
ATTACGCGCTTAGAAAATCGAATGCAAGATAAACTATTTCAAATGGATCTTGGCTAGCAGAAGTAAACATATACGTGTACATGCTGTAACAGCAGATTG  
AAAAATGGACGTGATTCTATTACGTCATTTTTCGTAAAGTGACCAATATCTTTTTCTCGAATCACTTCGATTTCTAAATATGTTCTATTTTTTTGCGA  
ACCCGTAATTCAGCGCATTACAGCTTCTCCGCTGCTACTAGAATTTCTCCATTTGACTCTACTCGTTCAGGCCAAACGCTTTTTTTTTAATGCTTCTTTTGAAC  
AAATGATTGTTGATTTCTAGAAGATAAGCTAAGCAGCGTATTCTTTATCTGACAGAATATACGTTTCTCTTTTTATTTTACTTTCTGCAAAAATGGATCTA  
ATGTGTAATGCTTCTTTCAATAAACGAGGGGTTCCAGGCTGTAACCTTCTCCATTTACTTTTGTCCCGTGTACTAAACAAGTCTGTAATGAAAAAGG  
GATTGCTTTCGTACGTTACTTCAAATGCTTGCAGGAAATGTAAGCACTTTGAAAGGCCAGATAAAGCTCCCATTTCTCACTGCTTCCGATAATACAGG  
CTTTATCTTTGGAATAGGCACGGAAGCTCCTTCAAAAAAGGAGCTCCGTTCCGAATAATCAACATACCGTTCATTGTTTGTCTCACACTTTTTTTAAAAATTT  
TCTGACTCTTATCATGTAATTATAAACAACCTCACATTTATTGAGATTTCTCCAACCTTTGGATAACATCATAGTATAGTCAAGTTATATGATAAAGTTGTTGCCAT  
GTAAGTAAACCTTTAGAGCAGTCTTTTCTAACTGAAAAATACGTATTTTCTGCTGCTGTAATGGGGATACAATTTTTTTGTAATAATTTAGTTTTTAG  
TAACTTTGACATATGTTCTCTTTTTAAAGCGGAGTAAATAGGAAAATACGTGAAATATTTACATAATGGAGGAAGACCAATGGGACGTTTGCCAAAAG  
ATAGAGAAATCAAGCGATTAAACGACGCTTGCAGTGGTATTGTTAATTTAGGATCATTTATTTTAAACAGGTGCTAGCTTTAGCATTTATTGGTTTATGAT  
GTTAAAAATATAAGATTTTTTATAAATAAAGAAAAAGACATGGTTTTGTTCCATGTCTTTTTAGGTTTATTCTTCTCAGACACTCCAGCAGATTGAAA  
CGTAGCCATATTGGCAATCATCAGTGAAGCCGAGTGCAGCAGCGGAAATGTAACAGCAGCTCCACTTCCCTCACCTAAACGAAGATTGAGGTTGAGGAGC  
GGTTTCTGCCAAGAAGCTTATTGCACACGCATGGCCTTGTCAACAGATTCGTACTAGCAAAACATATAGTCTTCTGCTTGTATTGATTCTGTTGCTA  
GAAGGGCTGCAACTGTACAATAAAACCATCTACTAAAATAGGAATACGGTGCAGCTGCGCCAGCATAGCACCTGTCATCCCGCAATTTCAAGACCC  
CCTATTTTACTAATAATATCAATCGGATCTGAGGGTAAATGTGCTGTTTTGACGCGCTTCTCAATCACGTTCACTTTGTGGCGCAGTTGTTTCATCAGAAA  
TCCCTGTGCCATTCCCGCAAGCTTAGAGACTTTTTCTCTGTAATACAGCTAAAATAGCCGTGCTTACGTAAGTATTTCCGATGCCCAATTTCTCCTACAATC  
AAACATTTAATCTTGGGCAATAAGCTTCTCAGCTTCTTATATCCGACTTGAACAGCCAGTTTCTGCCTATTGCGCGTCATCGCGTCTTCTTATAAAAAAT  
TGCTGTCCCGACTTCACTTTGCGTTGTACAAGGTCCTATGGGAAAGGTGAGAAGCAATGGGCC
