# Supplementary material for: Counterintuitive DNA Sequence Dependence in Supercoiling-Induced DNA Melting
Source: PubMed Central journal article supplement (PMC4625975; doi:10.1371/journal.pone.0141576), 2015-10-29
Supplement: pone.0141576.s007.pdf [file pone.0141576.s007.pdf]

| Construct                                       | Fw primer                                                                     | Rev primer                                                       | Restriction enzymes | Template DNA                                    |
|-------------------------------------------------|-------------------------------------------------------------------------------|------------------------------------------------------------------|---------------------|-------------------------------------------------|
| 1) 77% GC content                               | TTTTGCGGCCGCCA<br>GGCCACCCCTCG<br>TGA                                         | TTTTCTCGAGGGGAC<br>CACAAAGCCAGAA<br>TTCACGGCTG                   | NotI +<br>XhoI      | pSuperCos1-<br>Streptomyces<br>Clavuligerus DNA |
| pSuperCos1-<br>Streptomyces<br>Clavuligerus DNA | CACACAGCGCCGC<br>CCAGGCCACCCCC<br>TCGTGGACGAG                                 | CACACAGGATCCGG<br>CTTCCGCCGGTGC<br>GGCTCAGTCAC                   | NotI +<br>BamHI     | Streptomyces<br>Clavuligerus DNA                |
| pSuperCos1-<br>Streptomyces<br>Clavuligerus DNA | CACACAGGATCCCC<br>GGGTGTCCTCGGCTT<br>CCTG                                     | CACACAGAATTCAC<br>GGCTGAACTGGTT<br>CTCTCCCG                      | BamHI +<br>EcoRI    | Streptomyces<br>Clavuligerus DNA                |
| 2) 58% GC content                               | TTTTGCGGCCGCACA<br>GTAATTACGGTGCTG<br>CGCTGGAGAAACAG<br>GG                    | TTTTCTCGAGCGCCG<br>TTAACCCGGACGTG<br>CTGA                        | NotI +<br>XhoI      | Unmethylated cl857<br>Sam7 Lambda DNA           |
| 3) 42% asymmetric<br>spread of GC<br>content    | TTTTGCGGCCGCTCC<br>GTGGTGGCACAGAG<br>TACGGCAGA                                | TTTTCTCGAGAGAGT<br>TTCTGCGCAGTTAA<br>TCGAACAAGACCCG<br>T         | NotI +<br>XhoI      | Unmethylated cl857<br>Sam7 Lambda DNA           |
| 4) 42% GC content                               | TTTTGCGGCCGCCG<br>AAATTTTCTTCATAA<br>TAAAAGTTAAAAGCC<br>GCATCTCTCGCTACA<br>GC | TTTTCTCGAGAAGTG<br>ACGGAAGTGGATTT<br>GGATGAAACGGTTC<br>ATACAACGC | NotI +<br>XhoI      | Bacillus Megaterium<br>QM B1551 DNA             |
| 5) 39% GC content                               | TTTTGCGGCCGCGG<br>AAATCAAGATGAACT<br>AATTTATACGTACAA<br>AGTAAAAATTGGGA<br>ACA | TTTTCTCGAGTTTGC<br>ATAGTGCACAATTA<br>ATCGCGATTGTCCGC<br>GG       | NotI +<br>XhoI      | Bacillus Megaterium<br>QM B1551 DNA             |
| 6) 38% GC content                               | TTTTGCGGCCGCCG<br>CTAAACACTGTACAA<br>TTCGCAGCCGGTTA<br>GGATCA                 | TTTTGGGCCATTGC<br>TTCTGACCTTCCCA<br>TAAGGACCTTGTACA<br>ACGCA     | NotI +<br>ApaI      | Bacillus Megaterium<br>QM B1551 DNA             |
